## Running Title: Magnetothermal Peripheral Organ Stimulation

### Title: Probing Neuro-Endocrine Interactions Through Wireless Magnetothermal Stimulation of Peripheral Organs

Lisa Y. Maeng<sup>1\*</sup>, Dekel Rosenfeld<sup>2\*</sup>, Gregory J. Simandl<sup>3</sup>, Florian Koehler<sup>2,4</sup>, Alexander W. Senko<sup>2,4</sup>, Junsang Moon<sup>2,4</sup>, Georgios Varnavides<sup>2,4</sup>, Maria F. Murillo<sup>1</sup>, Adriano E. Reimer<sup>1,3</sup>, Aaron Wald<sup>3</sup>, Polina Anikeeva<sup>2,4,5</sup>+, Alik S. Widge<sup>1,3</sup>+

#### Affiliations:

<sup>1</sup>Department of Psychiatry, Massachusetts General Hospital and Harvard Medical School, Charlestown, MA 02129, USA

<sup>2</sup>Research Laboratory of Electronics and McGovern Institute for Brain Research, Massachusetts Institute of Technology, Cambridge, MA 02139, USA

<sup>3</sup>Department of Psychiatry and Behavioral Sciences, University of Minnesota, Minneapolis, MN 55455, USA

<sup>4</sup>Department of Materials Science and Engineering, Massachusetts Institute of Technology, Cambridge, MA 02139, USA

<sup>5</sup>Department of Brain and Cognitive Sciences, Massachusetts Institute of Technology, Cambridge, MA 02139, USA

+: Corresponding authors: [anikeeva@mit.edu](mailto:anikeeva@mit.edu), [awidge@umn.edu](mailto:awidge@umn.edu)

#### Dr. Polina Anikeeva

77 Massachusetts Avenue, Room 36-812  
Cambridge, MA 02139  
anikeeva@mit.edu  
617-258-7348

#### Dr. Alik S. Widge

2001 6<sup>th</sup> St SE, Room 3-208  
Minneapolis, MN 55455  
awidge@umn.edu  
612-625-7594

**Keywords:** epinephrine; corticosterone; adrenal gland; neuromodulation; neurostimulation; hormones

**Number of words in the abstract:** 148

**Number of words in the main text:** 2954

**Number of figures:** 2

**Number of tables (main):** 0

**Number of supplemental figures:** 1

**Number of supplemental tables:** 1

**Number of words in supplemental information:** 2411

## Abstract

Exposure to stress alters hypothalamic-pituitary-adrenal (HPA) axis reactivity; however, it is unclear exactly how or where within the HPA pathway these changes occur. Dissecting these mechanisms requires tools to reliably probe HPA function, particularly the adrenal component, with temporal precision. We previously demonstrated magnetic nanoparticle (MNP) technology to remotely trigger adrenal hormone release by activating thermally sensitive ion channels. Here, we applied adrenal magnetothermal stimulation to probe stress-induced HPA axis changes. MNP and control nanoparticles were injected into the adrenal glands of outbred rats subjected to a tone-shock conditioning/extinction/recall paradigm. We measured MNP-triggered adrenal release before and after conditioning through physiologic (heart rate) and serum (epinephrine, corticosterone) markers. Aversive conditioning altered adrenal function, reducing corticosterone and blunting heart rate increases post-conditioning. MNP-based organ stimulation provides a novel approach to probing the function of HPA and other neuro-endocrine axes and could help elucidate changes across stress and disease models.

## Introduction

Multiple psychiatric disorders, particularly stress and trauma-related conditions, are associated with dysregulation in the hypothalamic-pituitary-adrenal (HPA) axis (1–4), which mediates homeostatic stress responses. Systemically-released adrenal stress hormones, cortisol (CORT; or corticosterone in rodents) and epinephrine (E), are key elements in this pathway. Once the HPA axis is activated, homeostasis is maintained through negative feedback to prevent overstimulation. Circulating adrenal hormones reduce central secretion of their triggers such as corticotropin-releasing hormone (CRH) or adrenocorticotrophic hormone (ACTH). Disruption of this homeostatic loop, often by prolonged stress, is commonly found in depression and post-traumatic stress disorder (PTSD)(1,5–7). The consequences of chronic stress exposure or HPA axis dysregulation are mixed, with some studies reporting hyper-responsivity (increased CORT release), and others reporting hypo-responsivity, or a blunted CORT response (3,8–10). These inconsistencies may reflect individual differences in stress sensitivity, and they highlight the need for a more nuanced understanding of HPA function under stress. Specifically, methods are needed for probing the capacity for adrenal release and feedback adaptation at multiple points along the stress and recovery trajectory.

Circulating adrenal hormones also affect learning. Memories formed during states of high emotional arousal can persist and be reactivated more efficiently than memories formed during low arousal (11). These memory-enhancing effects can be adaptive or problematic, depending on the specific memory and its degree of generalization. For instance, trauma-related disorders involve formation of extinction-resistant emotional memories that then lead to pathological avoidance habits (12). There is great interest in finding ways to alter or augment extinction learning processes that could oppose these traumatic memories (13). Pre-clinical studies have suggested timed brain stimulation (14–17), glutamatergic agonists (18,19), and timed increases in adrenal hormones (1–5) as potential strategies for augmenting extinction. Invasive brain stimulation presents a challenge to routine clinical practice, and pharmacologic strategies have shown limited effectiveness in formal

trials (20–22). Part of the challenge is that manipulations may need to precisely coincide with the formation of extinction memories (16). This is the basis of a recently-approved brain stimulation treatment for obsessive-compulsive disorder (23). Methods for precisely timed adrenal release would enable pre-clinical studies of HPA effects on extinction learning.

We recently demonstrated an approach for temporally precise adrenal hormone control: direct, wireless adrenal gland stimulation (24). Biocompatible, non-toxic magnetic nanoparticles (MNPs) composed of iron oxide can be injected into adrenal glands (or almost any peripheral organ). In humans or larger animal models, that injection could be performed under X-ray, magnetic resonance, or ultrasound guidance, i.e. as a minimally invasive procedure. In the presence of alternating magnetic fields (AMF), the MNPs dissipate heat. This, in turn, opens native thermosensitive calcium-permeable ion channels from the transient receptor potential (TRP) family, depolarizing electrogenic cells (Figure 1A). This approach increases circulating epinephrine and corticosterone in rats (24), controlled by calcium influx into adrenal cells. This technology offers advantages over other means of probing peripheral organ function. It permits access to tissues where chronic indwelling hardware (e.g. electrodes, catheters) may be difficult to implant or secure. It can be applied without a tether, implying that it could be used in multi-animal assays such as social interaction. Magnetic fields readily penetrate deep into tissue, and using magnetic nanomaterials as transducers enables spatially restricted stimulation. This contrasts with inductive and ultrasonic approaches, where resolution and penetration depth are inversely correlated (25–29). Magnetic activation has advantages over other forms of hardware-free control such as chemogenetics, as it permits tight temporal control over organ stimulation (30).

In this study, we demonstrate the use of that technology to probe HPA axis function over time. We show that an acute stressor (threat conditioning) alters HPA axis function and provide pilot evidence that related behavior (extinction) can be modulated by timed adrenal hormone release.

## Methods and Materials

### Nanoparticle synthesis and characterization.

Iron oxide nanoparticles (NPs) were synthesized according to a previously published protocol. We synthesized wüstite (control NPs) or magnetite NPs (active MNPs) from sodium oleate and  $\text{FeCl}_3 \cdot 6\text{H}_2\text{O}$  in a multi-step heating, drying, and solvent control process. All NPs were redispersed in 5 ml of chloroform followed by surface functionalization using polyethylene glycol coating to make NPs biocompatible (see Supplement). Control NPs have the same physical dimensions and chemical elements as MNPs, but are non-magnetic (weakly antiferromagnetic) and do not exhibit hysteretic heating in AMFs (24,31).

### Subjects.

We tested magnetothermal stimulation in male Long Evans rats weighing 250-300g. We did not plan a fully-powered study for behavioral effects, but estimated the number of animals per group based on expected attrition (see Supplement). Rats were maintained on a 12 h light/dark cycle and ad libitum chow and water. Experiments were performed during the light phase of the light/dark cycle. All procedures were approved by the Subcommittee on Research Animal Care at the Massachusetts General Hospital (an Institutional Animal Care and Use Committee).

### Adrenal MNP injections.

The left adrenal gland of all rats was injected with MNPs or control NPs, under isoflurane anesthesia, after direct visualization and immobilization of the gland. We used a unilateral injection to reduce surgical burden. 1  $\mu\text{l}$  of nanoparticle solution (40  $\text{mg}_{[\text{Fe}]}/\text{ml}$ ) was injected at a rate of 0.1  $\mu\text{l}/\text{min}$  in at least two different locations, for a total volume of 2  $\mu\text{l}$ . Rats recovered from surgery for at least 7 days before entering the experiment. To define the volume and concentration needed for the *in vivo* injections, we created a finite element model to account for the heat distribution within the gland

considering the gland dimensions, blood perfusion and a fat layer surrounding the gland. The model was developed using Pennes' bio-heat equation and similar parameters as in Rosenfeld et al. (2020). We modified the previous model to fit the current experiment (see the Supplement for the table with values).

#### Magnetothermal stimulation.

We measured HPA axis function by acute magnetothermal stimulation of awake, restrained rats (Figure 1B). Rats were placed inside a plastic restraint tube, to which they had been habituated. The tube was then placed inside the bore of an *in vivo* alternating magnetic field (AMF) stimulation coil, which was a replica of that used in Rosenfeld et al. (2020). The coil was driven by a custom resonant circuit and was actively water cooled (24). At an AMF frequency of 623 kHz, the AMF amplitude values were matched to reach specific loss power (SLP, heating efficiency) of at least 600 W/g in MNPs as in the prior study (24). For all stimulation procedures, rats received 1 minute of active stimulation. Stimulation parameters were selected based on the amount of heat and its spread in the adrenal gland (Figure 1D). In addition, these animals were larger/older than those in Rosenfeld et al. (2020); therefore, we increased the stimulation time from the 40 seconds used in that prior paper, following the same heating model (Figure 1D).

#### Heart rate monitoring.

To verify that adrenal hormone (particularly epinephrine) release occurred in response to MNP heating, we measured stimulation-induced heart rate changes. A pulse oximetry sensor was attached to the paw after each animal was restrained, and heart rate (bpm) was recorded before, during, and after stimulation using a PhysioSuite (Kent Scientific, Torrington, CT). The experimenter performing stimulation and heart rate procedures (MFM) was blind to each rat's experimental condition (MNP vs. control NP).

## Behavior.

To assess the effects of adrenal stimulation on emotionally valenced learning, we employed a tone-shock conditioning/extinction/recall paradigm that we (32,33) and others (16,34) have previously used to test putative learning and memory enhancers. The experimenter (MFM) was blind to each rat's experimental condition. Similar to prior experiments, behavior included habituation to the apparatus, tone-shock conditioning, tone-only extinction, and tone-only extinction recall (Figure 1C). Immediately prior to extinction, each animal received 1 minute of magnetothermal stimulation within the coil described above. Pre- and post-stimulation blood samples were collected 6 and 7 days after extinction. We quantified defensive behavior (freezing) by video analysis (ANY-maze, Stoelting Co., Wood Dale, IL).

## Serum hormone quantification.

Five days after behavioral testing, we further verified hormone release by lateral tail vein blood collections before and immediately after stimulation (Figure 1C). We previously verified stimulation-induced hormone release properties in unconditioned animals in Rosenfeld et al. (2020). As such, we collected blood samples only after the conditioning and extinction sessions in the current study. Serum hormone levels were quantified via ELISA (MyBioSource, Epinephrine: MBS264776, Corticosterone: MBS761865).

## Histology and image analysis of adrenal glands.

Following the experiment, rats were sacrificed via injections of pentobarbital/phenytoin at 150 mg/kg pentobarbital (Beuthanasia®-D C IIN, Merck Animal Health, Patterson Veterinary, Devens, MA) and transcardial perfusion with 4% paraformaldehyde. Adrenal glands were sectioned in agarose with a thickness of 40  $\mu$ m and mounted on glass slides to be imaged in a laser scanning confocal microscope (Fluoview FV1000, Olympus). The percentage of nanoparticle coverage of each adrenal

sub-region was determined from mosaic scans of the entire adrenal slice via image analysis as in Rosenfeld et al. (2020). Post-processing transformed each adrenal slice to an ellipse with the same semi-axes. This permitted labeling of adrenal sub-regions: medulla, zona glomerulosa (ZG), zona fasciculata (ZC) and zona reticularis (ZR). A map of injection locations was generated across 16 adrenal glands injected with NPs and defined the percentage of area covered with MNPs for each injected gland (Figure 1E, F).

#### Statistical analysis.

All analyses were performed using RStudio. As noted above, this study was not powered to detect significant between-group differences, and we present parametric statistics primarily to demonstrate possible effect sizes. See the Supplement for the rationale for each analytic choice.

We analyzed heart rate for Days 1 & 2 (pre-conditioning) and Day 4 (post-conditioning) separately, retaining only animals with adequate data and verified NP placement. We summed samples during stimulation (300 to 360 sec) to compute the area under the heart rate curve (AUC). We compared AUC of active and control conditions using a generalized linear model with gamma distribution, identity link function, and a single independent variable (treatment condition).

After excluding animals for experimental failures and outlier values, we analyzed the mean of the serum hormone levels across the two days of collection. We converted the data to a post-stim/pre-stim ratio, which we compared between active and control animals with a two-sample t-test on the log of the post/pre ratio.

We quantified freezing behavior as the percentage of the 30s CS tone that was spent freezing. Data were normalized to each rat's individual baseline and smoothed using a centered moving average. Freezing was then analyzed in a beta regression using trial, testing phase, and treatment (fixed effects, including 2-way and 3-way interaction terms) as explanatory variables. As an additional unplanned analysis, we tested whether active vs. control animals differed in their freezing at the end of extinction (Trials 18-20), using an independent-samples t-test.



## Results.

### MNP influences on heart rate.

Prior to tone-shock conditioning, animals injected with active MNPs showed adrenal engagement in response to an AMF stimulus, evidenced by an increased heart rate during stimulation compared to controls (Figure 2A). The between-group difference did not reach significance in this small sample [ $t(14)=0.807$ ,  $p=0.433$ ]. Further, aversive conditioning changed adrenal responsivity. After conditioning (but before extinction on day 4), the same stimulation produced no visible difference in heart rate between the control and active MNP animals [ $t(14)=-0.025$ ,  $p=0.98$ ] (Figure 2B). Heart rate rose more slowly in the animals injected with active MNPs, and there was greater variability as stimulation continued (increasing width of error bars specifically during the stimulation period).

### MNP modulation of adrenal hormones.

After aversive conditioning and extinction, the circulating hormone response to magnetothermal stimulation was also altered. In animals injected with active MNPs, serum CORT and E both decreased from pre- to post-stimulation (Figure 2C, D). The change in CORT reached statistical significance compared to control MNPs [ $t(16)=-2.2$ ,  $p=0.047$ ], whereas the change in E did not [ $t(14)=-1.8$ ,  $p=0.091$ ], although significance should be evaluated with caution given the sample size. Importantly, these are the reverse of the change we previously reported in unconditioned animals (24).

### MNP modulation of defensive behavior.

Freezing to conditioned tones did not significantly differ between the animals injected with active MNPs and those injected with control non-magnetic NPs in any experimental phase (Figure

2E, F). There was a non-significant enhancement of extinction learning from adrenal stimulation at the end of extinction [ $t(20.4)=-0.579$ ,  $p= 0.569$ ], that did not persist to the recall phase.

## **Discussion.**

We previously demonstrated remote control of adrenal hormone release via magnetically triggered heating of locally injected MNPs (24). Here, we demonstrated the use of this technology to probe the state dependence of HPA axis function. After aversive conditioning, the same adrenal stimulation produced visibly different changes in heart rate. This may represent exhaustion of a readily releasable pool. After conditioning, animals may have continuously high adrenergic tone, with little reserve E available for release in response to subsequent stimulation. This may offer a model for persistent hyper-arousal in trauma/stress-related disorders and demonstrates the potential role of this technology as a probe of neuro-endocrine interactions. MNP stimulation also decreased serum E and CORT. In our prior study of non-conditioned animals, the same stimulation increased these hormones at the same time point (24). This aligns with the heart rate results, in that it again represents a blunted response. These decreases potentially reflect an up-regulation of E/CORT metabolism or feedback inhibition as a result of a repeatedly activated HPA axis during conditioning, which could lead to a net decrease by the post-stimulation measurement (35). These results further demonstrate that magnetothermally-driven adrenal release can probe learning-related alterations of HPA axis function.

Behaviorally, we observed only a small difference in freezing, even though circulating adrenal mediators might be expected to improve extinction learning (36–38). The reduction in pre- to post-stimulation serum levels suggests that the lack of a behavioral difference may be driven by a lack of sustained change in circulating mediators, or even by their suppression. The timing of activation/secretion may also be important. Previous studies suggest time-dependent memory enhancement, e.g. hydrocortisone reduced defensive behavior only if given close to the time of training (39). Because our technology allows more precise control over hormone release timing

compared to commonly used approaches such as a systemic injection or delivery via an osmotic pump, it could permit dissection of this time dependence.

The current approach was limited to adrenal gland activation by triggering heat-sensitive TRP channels, in a relatively non-specific way across the entire organ, in restrained animals. However, the resulting limitations can be overcome. For example, in tissue without thermosensitive channels, we have activated mechanosensitive ion channels by altering the MNP structure and magnetic field conditions (40). Moreover, magnetothermal stimulation can also inhibit cell activity by activating heat-sensitive hyperpolarizing channels (41). Controlled injections of MNPs to specific substructures within the adrenal gland, instead of the current multiple-injection approach, could increase specificity and permit the independent release of individual hormones. Specificity might also be achieved using a multiplexing approach for controlling different populations of MNPs within the same organ (42). While we used restrained animals, the current coil design would permit experiments with freely moving mice (43). Freely moving rat experiments are possible albeit demand scaling up of the coils and driving power electronics (44).

This technology could generalize beyond the HPA axis. Sex hormones such as estrogen, progesterone, and testosterone all affect learning processes (32,33,45–47) and are broadly implicated in psychiatrically relevant functions (6,48,50). Systemic administration of these hormones in animal studies relies on subcutaneous or intraperitoneal injections, which can be stressful and interfere with the sex hormone effects being investigated. TRP receptors are present in the ovaries, testes, and hypothalamus (49,51,52). Therefore, the hypothalamic-pituitary-gonadal (HPG) axis could be similarly probed by magnetothermal stimulation.

Beyond their use as probes of peripheral organ function, magnetic nanomaterials have been increasingly recognized as therapies and “theranostic” tools. They are being applied for treating cancer, diagnosing atherosclerosis, delivering drugs, etc. (53,54). However, their utility as tools for

neuropsychiatric treatment and investigation is less defined. While intracranial or deep brain MNP stimulation has mostly been validated with motor behaviors (55), these particles may be a valuable tool for creating and/or manipulating models of neuropsychiatric disorders (43,56). For instance, MNP stimulation of the prelimbic cortex reduced immobility in the forced-swim test and increased sucrose consumption in stressed mice (56). Rao et al. (2019) demonstrated the use of MNPs for targeted drug delivery, where MNP-stimulated drug release increased dopamine-mediated social behavior. While these findings illustrate how MNP stimulation can be used to alter behavior via central modulation, the present study suggests a potential for modulation in the periphery, which may be more accessible and translatable.

Magnetothermal or magnetomechanical approaches are not universally useful. Chemogenetics will be simpler wherever temporal precision is not necessary. Very complex arenas will be difficult to instrument with coils for MNP activation, favoring more mature, tethered technologies such as optogenetics. The coils require specialized driving hardware and high-voltage supply lines that may not be available in all laboratory environments. It would similarly be hard to run many animals at once using this paradigm, and pharmacological/chemogenetic tools would be more suited if high throughput is needed. As nanomaterials, MNPs still need to be placed into organs of interest and may degrade, migrate, or be eliminated over time, unlike larger optogenetic fibers (57,58).

Despite the limitations described above, we have demonstrated the use of MNPs to remotely and more precisely detect and assess alterations within a peripheral stress system. Future research could further examine the timing of MNP peripheral stimulation effects on behavior, influences in the brain, and their potential role in the restoration of post-conditioning adrenal function. As the technology becomes more refined and widely available, these on-demand peripheral release approaches could provide valuable new tools for understanding and eventually altering the biology of mental illness beyond the brain.

## **Acknowledgements**

This work was funded in part by the DARPA ElectRx Program (HR0011-15-C-0155 under Dr. D. Weber), the Bose Research Grant, and the NIH BRAIN Initiative (1R01MH111872). This work made use of the MIT MRSEC Shared Experimental Facilities under award number DMR-14-19807 from the NSF. D.R. is a recipient of the MIT-Technion Fellowship. A.S.W. was additionally supported by the MnDRIVE Brain Conditions Initiative.

## **Disclosures**

Dr. Widge, Dr. Anikeeva, and Dr. Rosenfeld are inventors on a patent application for therapeutic uses of controlled adrenal release. Dr. Maeng, Gregory J. Simandl, Florian Koehler, Dr. Senko, Dr. Moon, Georgios Varnavides, Maria F. Murillo, Dr. Reimer, and Aaron Wald do not have any financial or other conflicts of interest to declare.

## Figure Legends

**Figure 1.** Experimental design and adrenal histology. **(A)** When an alternating magnetic field (AMF) is applied, the magnetic nanoparticles dissipate heat that causes the opening of heat-sensitive calcium ion channels (TRPV1 receptors). The calcium influx causes E and CORT release from adrenal cells. **(B)** Schematic diagram of the procedures that were performed in order. 1. Adrenal MNP injections. 2. Heart rate monitoring before and during magnetothermal stimulation. 3. Aversive conditioning and extinction. 4. Serum collections during magnetothermal stimulation for hormone analyses. **(C)** Experimental timeline. Following adrenal MNP injections, heart rate monitoring took place during MNP stimulation for 2 days (days 1 and 2) before the 3-day behavioral testing (days 3-5). Five days later, blood was collected for serological hormone (E and CORT) measurements (days 10 and 11). **(D)** Finite element modeling of temperature increases at 2 small-volume MNP injection sites within the adrenal gland at 20-s, 40-s, and 60-s of AMF applied. Scale bar = 1mm. **(E)** Representative mosaic of an adrenal gland section with two MNP injections (two black holes). Scale bar = 500  $\mu\text{m}$ . **(F)** A map of MNP and WNP injection sites in the adrenal gland across all animals (n=16).

**Figure 2.** Magnetothermal adrenal stimulation effects on heart rate, hormone levels, and freezing behavior. **(A, B)** Heart rate measurement during magnetothermal stimulation on (A) days 1 and 2 before conditioning and (B) on day 4 after conditioning. **(C, D)** Serological analysis. (C) Corticosterone and (D) epinephrine were measured before (pre) and after (post) magnetothermal stimulation. **(E)** Percent freezing per trial across the habituation, conditioning, extinction, and recall phases of the behavioral paradigm (controls, n=13; active, n=10). **(F)** Percent freezing averaged across the last three trials of extinction (Trials 18-20) for control and active MNP rats.

## Figures:

### Figure 1:

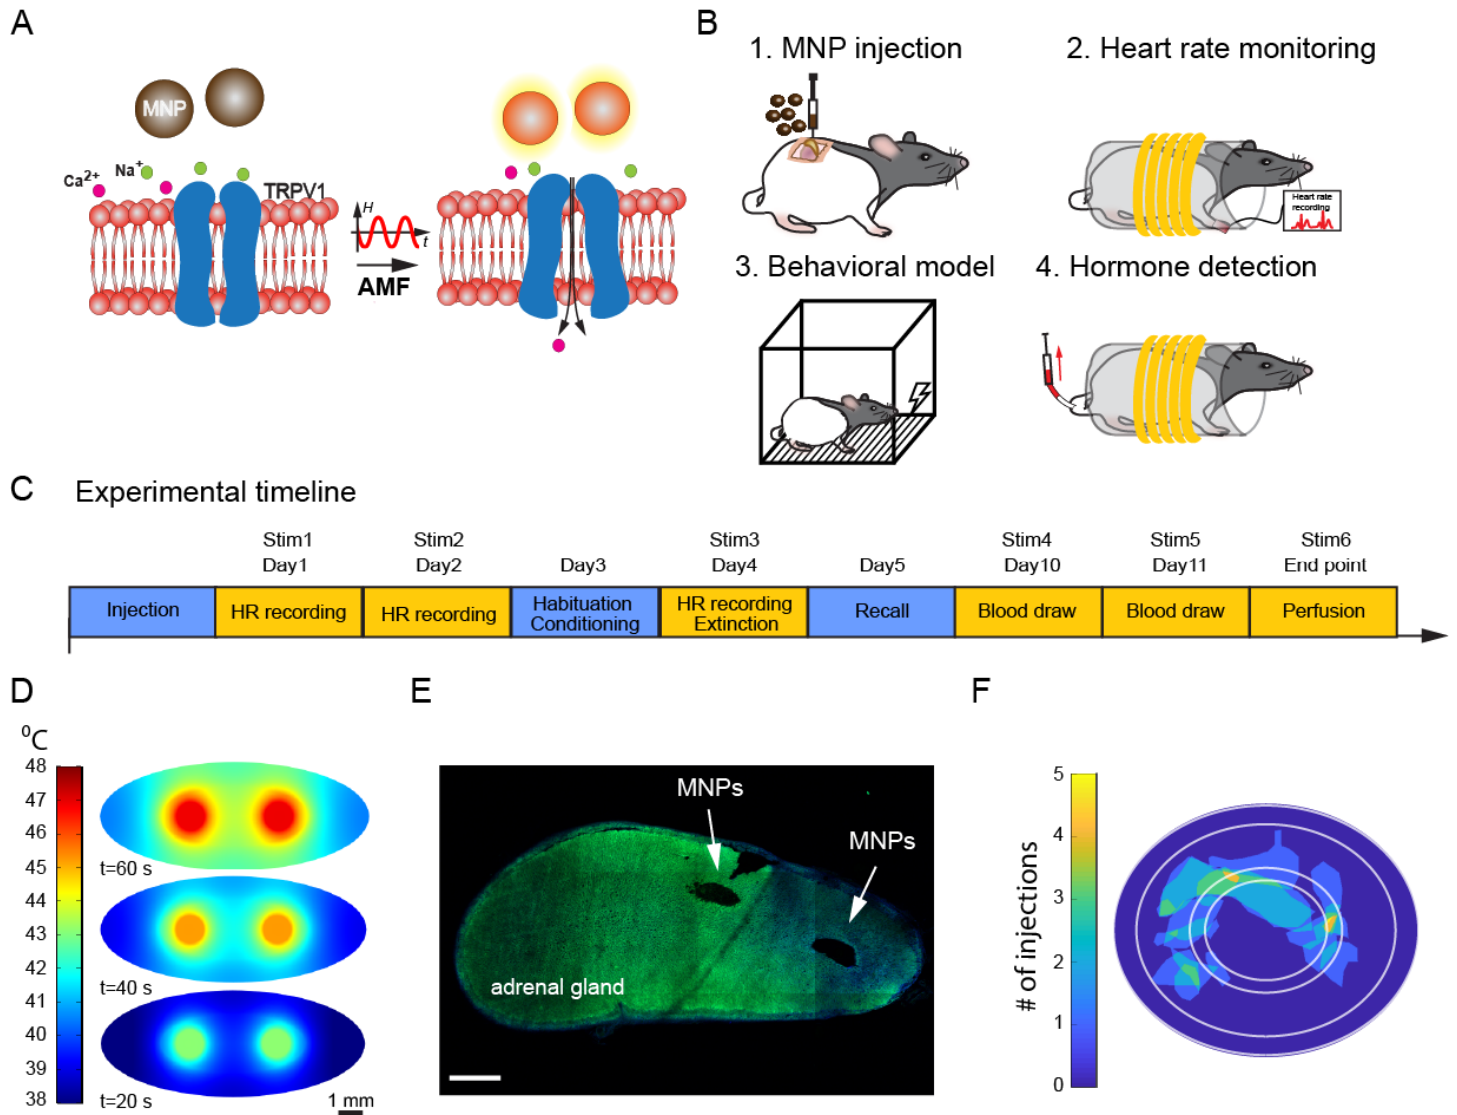

Figure 2

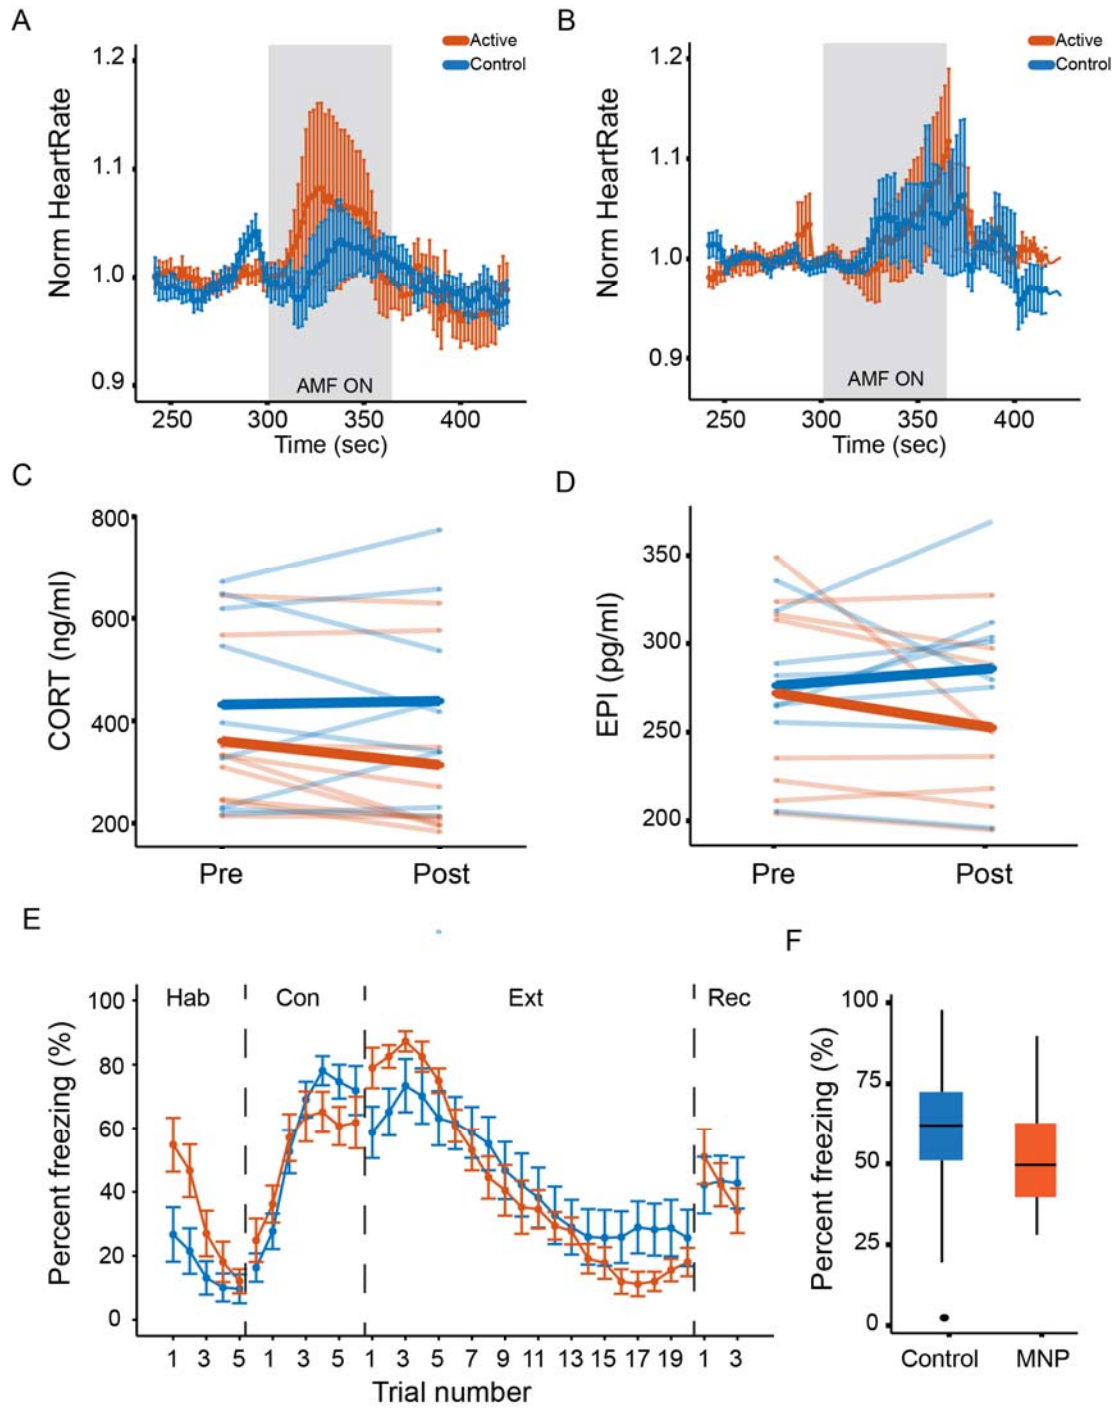



## References

1. de Kloet ER, Joëls M, Holsboer F (2005): Stress and the brain: from adaptation to disease. *Nat Rev Neurosci* 6: 463–475.
2. Iob E, Kirschbaum C, Steptoe A (2020): Persistent depressive symptoms, HPA-axis hyperactivity, and inflammation: the role of cognitive-affective and somatic symptoms [no. 5]. *Mol Psychiatry* 25: 1130–1140.
3. Klaassens ER, Giltay EJ, Cuijpers P, van Veen T, Zitman FG (2012): Adulthood trauma and HPA-axis functioning in healthy subjects and PTSD patients: A meta-analysis. *Psychoneuroendocrinology* 37: 317–331.
4. McEwen BS (2005): Glucocorticoids, depression, and mood disorders: structural remodeling in the brain. *Metabolism* 54: 20–23.
5. de Kloet CS, Vermetten E, Geuze E, Kavelaars A, Heijnen CJ, Westenberg HGM (2006): Assessment of HPA-axis function in posttraumatic stress disorder: pharmacological and non-pharmacological challenge tests, a review. *J Psychiatr Res* 40: 550–567.
6. Dwyer JB, Aftab A, Radhakrishnan R, Widge A, Rodriguez CI, Carpenter LL, *et al.* (2020): Hormonal Treatments for Major Depressive Disorder: State of the Art. *Am J Psychiatry* 177: 686–705.
7. Yehuda R, Giller EL, Southwick SM, Lowy MT, Mason JW (1991): Hypothalamic-pituitary-adrenal dysfunction in posttraumatic stress disorder. *Biol Psychiatry* 30: 1031–1048.
8. Nemeroff CB (1996): The corticotropin-releasing factor (CRF) hypothesis of depression: new findings and new directions. *Mol Psychiatry* 1: 336–342.
9. Pitman RK, Orr SP (1990): Twenty-four hour urinary cortisol and catecholamine excretion in combat-related posttraumatic stress disorder. *Biol Psychiatry* 27: 245–247.
10. Yehuda R (2006): Advances in understanding neuroendocrine alterations in PTSD and their therapeutic implications. *Ann N Y Acad Sci* 1071: 137–166.
11. Cahill L, McGaugh JL (1998): Mechanisms of emotional arousal and lasting declarative memory. *Trends Neurosci* 21: 294–299.

12. American Psychiatric Association (2013): *Diagnostic and Statistical Manual of Mental Disorders*, 5th ed. Washington, D.C.: American Psychiatric Association.
13. Kida S (2019): Reconsolidation/destabilization, extinction and forgetting of fear memory as therapeutic targets for PTSD. *Psychopharmacology (Berl)* 236: 49–57.
14. Bukalo O, Pinard CR, Silverstein S, Brehm C, Hartley ND, Whittle N, *et al.* (2015): Prefrontal inputs to the amygdala instruct fear extinction memory formation. *Sci Adv* 1. <https://doi.org/10.1126/sciadv.1500251>
15. Likhtik E, Paz R (2015): Amygdala-prefrontal interactions in (mal)adaptive learning. *Trends Neurosci* 38: 158–166.
16. Milad MR, Quirk GJ (2002): Neurons in medial prefrontal cortex signal memory for fear extinction. *Nature* 420: 70–74.
17. Vidal-Gonzalez I, Vidal-Gonzalez B, Rauch SL, Quirk GJ (2006): Microstimulation reveals opposing influences of prelimbic and infralimbic cortex on the expression of conditioned fear. *Learn Mem Cold Spring Harb N* 13: 728–733.
18. La Buissonnière-Ariza V, Schneider SC, Storch EA (2020): Pharmacological enhancement of extinction learning. *Clinical Handbook of Fear and Anxiety: Maintenance Processes and Treatment Mechanisms*. Washington, DC, US: American Psychological Association, pp 345–357.
19. Norberg MM, Krystal JH, Tolin DF (2008): A Meta-Analysis of D-Cycloserine and the Facilitation of Fear Extinction and Exposure Therapy. *Biol Psychiatry* 63: 1118–1126.
20. Litz BT, Salters-Pedneault K, Steenkamp MM, Hermos JA, Bryant RA, Otto MW, Hofmann SG (2012): A randomized placebo-controlled trial of D-cycloserine and exposure therapy for posttraumatic stress disorder. *J Psychiatr Res* 46: 1184–1190.
21. Ressler KJ (2020): Translating Across Circuits and Genetics Toward Progress in Fear- and Anxiety-Related Disorders. *Am J Psychiatry* 177: 214–222.
22. Storch EA, Merlo LJ, Bengtson M, Murphy TK, Lewis MH, Yang MC, *et al.* (2007): D-cycloserine does not enhance exposure-response prevention therapy in obsessive-compulsive disorder. *Int Clin Psychopharmacol* 22: 230–237.

23. Carmi L, Tendler A, Bystritsky A, Hollander E, Blumberger DM, Daskalakis J, *et al.* (2019): Efficacy and Safety of Deep Transcranial Magnetic Stimulation for Obsessive-Compulsive Disorder: A Prospective Multicenter Randomized Double-Blind Placebo-Controlled Trial. *Am J Psychiatry* 176: 931–938.
24. Rosenfeld D, Senko AW, Moon J, Yick I, Varnavides G, Gregurec D, *et al.* (2020): Transgene-free remote magnetothermal regulation of adrenal hormones. *Sci Adv* 6: eaaz3734.
25. Bystritsky A, Korb AS (2015): A Review of Low-Intensity Transcranial Focused Ultrasound for Clinical Applications. *Curr Behav Neurosci Rep* 2: 60–66.
26. Christiansen MG, Senko AW, Anikeeva P (2019): Magnetic Strategies for Nervous System Control. *Annu Rev Neurosci* 42: 271–293.
27. Fekete Z, Horváth ÁC, Zátanyi A (2020): Infrared neuromodulation: a neuroengineering perspective. *J Neural Eng* 17: 051003.
28. Niu X, Yu K, He B (2018): On the neuromodulatory pathways of the in vivo brain by means of transcranial focused ultrasound. *Curr Opin Biomed Eng* 8: 61–69.
29. Yizhar O, Fenno LE, Davidson TJ, Mogri M, Deisseroth K (2011): Optogenetics in neural systems. *Neuron* 71: 9–34.
30. Shahriari D, Rosenfeld D, Anikeeva P (2020): Emerging Frontier of Peripheral Nerve and Organ Interfaces. *Neuron* 108: 270–285.
31. Chen R, Romero G, Christiansen MG, Mohr A, Anikeeva P (2015): Wireless magnetothermal deep brain stimulation. *Science* 347: 1477–1480.
32. Maeng LY, Cover KK, Taha MB, Landau AJ, Milad MR, Lebrón-Milad K (2017): Estradiol shifts interactions between the infralimbic cortex and central amygdala to enhance fear extinction memory in female rats. *J Neurosci Res* 95: 163–175.
33. Maeng LY, Taha MB, Cover KK, Glynn SS, Murillo M, Lebron-Milad K, Milad MR (2017): Acute gonadotropin-releasing hormone agonist treatment enhances extinction memory in male rats. *Psychoneuroendocrinology* 82: 164–172.
34. Quirk GJ, Russo GK, Barron JL, Lebron K (2000): The role of ventromedial prefrontal cortex in the recovery of extinguished fear. *J Neurosci Off J Soc Neurosci* 20: 6225–6231.

35. Kannan CR (2012): *The Adrenal Gland*. Springer Science & Business Media.
36. de Quervain D, Wolf OT, Roozendaal B (2019): Glucocorticoid-induced enhancement of extinction—from animal models to clinical trials. *Psychopharmacology (Berl)* 236: 183–199.
37. Merz CJ, Hamacher-Dang TC, Wolf OT (2014): Exposure to stress attenuates fear retrieval in healthy men. *Psychoneuroendocrinology* 41: 89–96.
38. Wolf OT, Atsak P, de Quervain DJ, Roozendaal B, Wingenfeld K (2016): Stress and Memory: A Selective Review on Recent Developments in the Understanding of Stress Hormone Effects on Memory and Their Clinical Relevance. *J Neuroendocrinol* 28. <https://doi.org/10.1111/jne.12353>
39. Merz CJ, Hamacher-Dang TC, Stark R, Wolf OT, Hermann A (2018): Neural Underpinnings of Cortisol Effects on Fear Extinction. *Neuropsychopharmacol Off Publ Am Coll Neuropsychopharmacol* 43: 384–392.
40. Gregurec D, Senko AW, Chuvilin A, Reddy PD, Sankararaman A, Rosenfeld D, *et al.* (2020): Magnetic Vortex Nanodiscs Enable Remote Magnetomechanical Neural Stimulation. *ACS Nano* 14: 8036–8045.
41. Munshi R, Qadri SM, Pralle A (2018): Transient Magnetothermal Neuronal Silencing Using the Chloride Channel Anoctamin 1 (TMEM16A). *Front Neurosci* 12. <https://doi.org/10.3389/fnins.2018.00560>
42. Moon J, Christiansen MG, Rao S, Marcus C, Bono DC, Rosenfeld D, *et al.* (2020): Magnetothermal Multiplexing for Selective Remote Control of Cell Signaling. *Adv Funct Mater* 30: 2000577.
43. Rao S, Chen R, LaRocca AA, Christiansen MG, Senko AW, Shi CH, *et al.* (2019): Remotely controlled chemomagnetic modulation of targeted neural circuits [no. 10]. *Nat Nanotechnol* 14: 967–973.
44. Christiansen MG, Howe CM, Bono DC, Perreault DJ, Anikeeva P (2017): Practical methods for generating alternating magnetic fields for biomedical research. *Rev Sci Instrum* 88: 084301.
45. Hwang MJ, Zsido RG, Song H, Pace-Schott EF, Miller KK, Lebron-Milad K, *et al.* (2015): Contribution of estradiol levels and hormonal contraceptives to sex differences within the fear network during fear conditioning and extinction. *BMC Psychiatry* 15: 295.
46. Milad MR, Zeidan MA, Contero A, Pitman RK, Klibanski A, Rauch SL, Goldstein JM (2010): The influence of gonadal hormones on conditioned fear extinction in healthy humans. *Neuroscience* 168: 652–658.

47. Seligowski AV, Hurly J, Mellen E, Ressler KJ, Ramikie TS (2020): Translational studies of estradiol and progesterone in fear and PTSD. *Eur J Psychotraumatology* 11: 1723857.
48. Andreano JM, Cahill L (2009): Sex influences on the neurobiology of learning and memory. *Learn Mem Cold Spring Harb N* 16: 248–266.
49. Kunert-Keil C, Bisping F, Krüger J, Brinkmeier H (2006): Tissue-specific expression of TRP channel genes in the mouse and its variation in three different mouse strains. *BMC Genomics* 7: 159.
50. Hwang WJ, Lee TY, Kim NS, Kwon JS (2021): The Role of Estrogen Receptors and Their Signaling across Psychiatric Disorders [no. 1]. *Int J Mol Sci* 22: 373.
51. Stein Robert J., Santos Soledad, Nagatomi Jiro, Hayashi Yukio, Minnery Brandon S., Xavier Macrina, *et al.* (2004): Cool (trpm8) and hot (trpv1) receptors in the bladder and male genital tract. *J Urol* 172: 1175–1178.
52. Surkin PN, Dmytrenko G, Giorgio NPD, Bizzozzero M, Laurentiis AD, Fernández-Solari J (2020): Participation of TRPV1 in the activity of the GnRH system in male rats. *Eur J Neurosci* 52: 2995–3001.
53. Gul S, Khan SB, Rehman IU, Khan MA, Khan MI (2019): A Comprehensive Review of Magnetic Nanomaterials Modern Day Theranostics. *Front Mater* 6. <https://doi.org/10.3389/fmats.2019.00179>
54. Williams HM (2017): The application of magnetic nanoparticles in the treatment and monitoring of cancer and infectious diseases. *Biosci Horiz Int J Stud Res* 10. <https://doi.org/10.1093/biohorizons/hzx009>
55. Kozielski KL, Jahanshahi A, Gilbert HB, Yu Y, Erin Ö, Francisco D, *et al.* (2021): Nonresonant powering of injectable nanoelectrodes enables wireless deep brain stimulation in freely moving mice. *Sci Adv* 7: eabc4189.
56. Lu Q-B, Sun J-F, Yang Q-Y, Cai W-W, Xia M-Q, Wu F-F, *et al.* (2020): Magnetic brain stimulation using iron oxide nanoparticle-mediated selective treatment of the left prelimbic cortex as a novel strategy to rapidly improve depressive-like symptoms in mice. *Zool Res* 41: 381–394.
57. Kolosnjaj-Tabi J, Lartigue L, Javed Y, Luciani N, Pellegrino T, Wilhelm C, *et al.* (2016): Biotransformations of magnetic nanoparticles in the body. *Nano Today* 11: 280–284.
58. Tsoi KM, MacParland SA, Ma X-Z, Spetzler VN, Echeverri J, Ouyang B, *et al.* (2016): Mechanism of hard-nanomaterial clearance by the liver [no. 11]. *Nat Mater* 15: 1212–1221.

### **citations for the RStudio packages:**

**betareg:** Francisco Cribari-Neto, Achim Zeileis (2010). Beta Regression in R. Journal of Statistical Software 34(2), 1-24. URL <http://www.jstatsoft.org/v34/i02/>.

**broom:** David Robinson, Alex Hayes and Simon Couch (2020). broom: Convert Statistical Objects into Tidy Tibbles. R package version 0.7.3. <https://CRAN.R-project.org/package=broom>

**fitdistrplus:** Marie Laure Delignette-Muller, Christophe Dutang (2015).  
fitdistrplus: An R Package for Fitting Distributions. Journal of Statistical Software, 64(4), 1-34. URL <http://www.jstatsoft.org/v64/i04/>.

**ggplot2:** H. Wickham. ggplot2: Elegant Graphics for Data Analysis. Springer-Verlag New York, 2016.

**ggpubr:** Alboukadel Kassambara (2020). ggpubr: 'ggplot2' Based Publication Ready Plots. R package version 0.4.0. <https://CRAN.R-project.org/package=ggpubr>

**imputeTS:** Steffen Moritz and Thomas Bartz-Beielstein, *The R Journal* (2017) 9:1, pages 207-218. <https://cran.r-project.org/web/packages/imputeTS/index.html>

**plotrix:** Lemon, J. (2006) Plotrix: a package in the red light district of R. R-News, 6(4): 8-12.

**readxl:** Hadley Wickham and Jennifer Bryan (2019). readxl: Read Excel Files. R package version 1.3.1. <https://CRAN.R-project.org/package=readxl>

**tidyverse:** Wickham et al., (2019). Welcome to the tidyverse. Journal of Open Source Software, 4(43), 1686, <https://doi.org/10.21105/joss.01686>
